# Supplementary material for: The carbon chain growth during the onset of CVD graphene formation on γ-Al 2 O 3 is promoted by unsaturated CH 2 ends
Source: Royal Society of Chemistry journal article supplement (doi:10.1039/d2cp01554d), 2022-01-01
Supplement: d2cp01554d1.pdf [file d2cp01554d1.pdf]

## Supporting Information for

### The carbon chain growth during onset CVD graphene formation on $\gamma$ - $\text{Al}_2\text{O}_3$ is promoted by unsaturated $\text{CH}_2$ ends

Qi Zhao<sup>a</sup>, Masanori Yamamoto<sup>b</sup>, Kaoru Yamazaki<sup>†c</sup>, Hiroto Nishihara<sup>b</sup>, Rachel Crespo-Otero<sup>a\*</sup>, Devis Di Tommaso<sup>a\*</sup>

<sup>a</sup> Department of Chemistry, Queen Mary University of London, Mile End Road, London E1 4NS, UK

<sup>b</sup> Advanced Institute for Materials Research (WPI-AIMR) / Institute of Multidisciplinary Research for Advanced Materials, Tohoku University, 2-1-1 Katahira, Aoba, Sendai 980-8577, Japan

<sup>c</sup> Institute for Materials Research, Tohoku University, 2-1-1 Katahira, Aoba, Sendai 980-8577, Japan

<sup>†</sup>Present Address: RIKEN Center for Advanced Photonics, RIKEN, 2-1 Hirosawa, Wako, Saitama 351-0198, Japan

### S1. Supplementary Figures

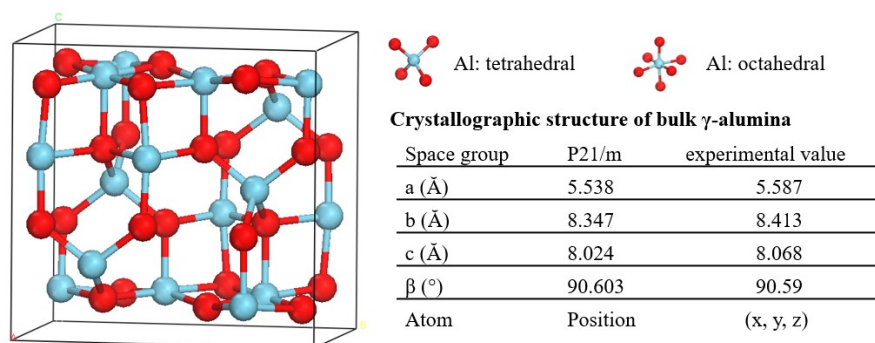

**Figure S1.** The bulk cell of  $\gamma$ - $\text{Al}_2\text{O}_3$  (red and blue sphere represent the O anions and Al cations respectively).

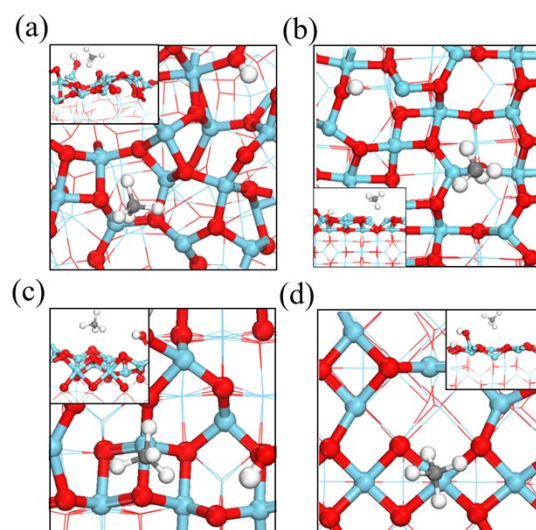

**Figure S2.** Top views of  $\text{CH}_4^*$  adsorption models on (a)  $\gamma$ - $\text{Al}_2\text{O}_3(111)$ ; (b)  $\gamma$ - $\text{Al}_2\text{O}_3(110)$ ; (c)  $\gamma$ - $\text{Al}_2\text{O}_3(100)$ ; (d)  $\gamma$ - $\text{Al}_2\text{O}_3(001)$ . The insets represent the corresponding side views. (Red, blue, grey, and white spheres represent the O, Al, C and H atoms, respectively).

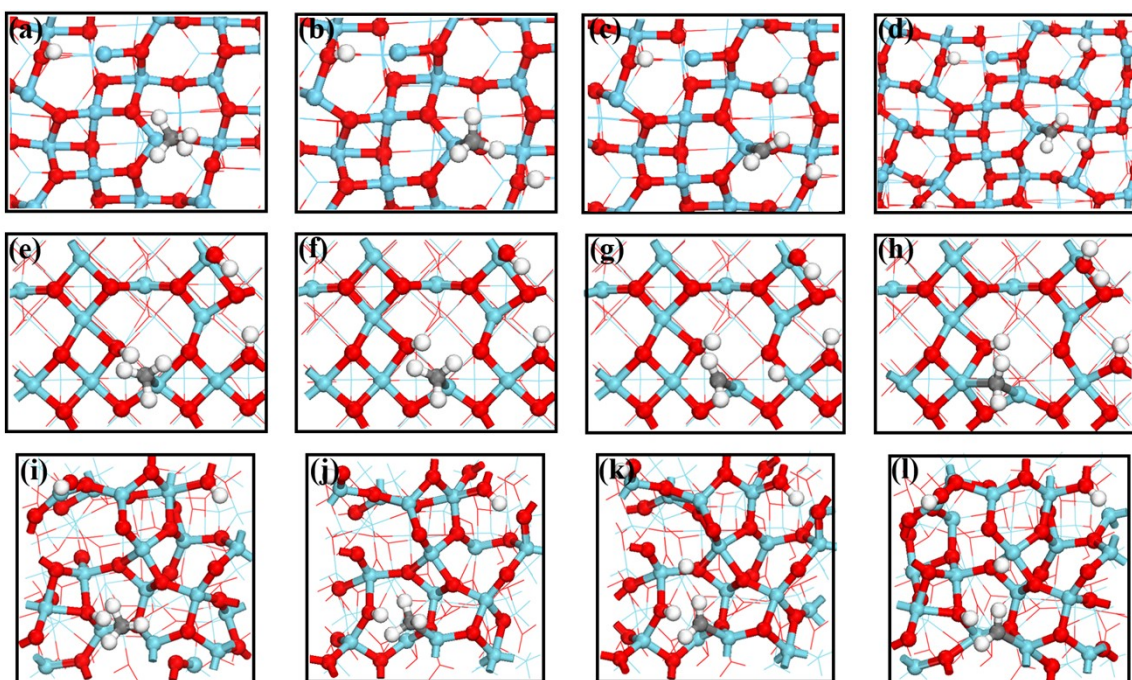

**Figure S3.** The structures include intermediates and transition states of the first two steps of the  $\text{CH}_4$  dehydrogenation on  $\gamma\text{-Al}_2\text{O}_3$  (110): **(a)** TS1; **(b)**  $\text{CH}_3$ ; **(c)** TS2; **(d)**  $\text{CH}_2$ ;  $\gamma\text{-Al}_2\text{O}_3$  (001): **(e)** TS1; **(f)**  $\text{CH}_3$ ; **(g)** TS2; **(h)**  $\text{CH}_2$ ; and  $\gamma\text{-Al}_2\text{O}_3$  (111): **(i)** TS1; **(j)**  $\text{CH}_3$ ; **(k)** TS2; **(l)**  $\text{CH}_2$ . (Red, blue, grey, and white spheres represent the O, Al, C and H atoms, respectively).

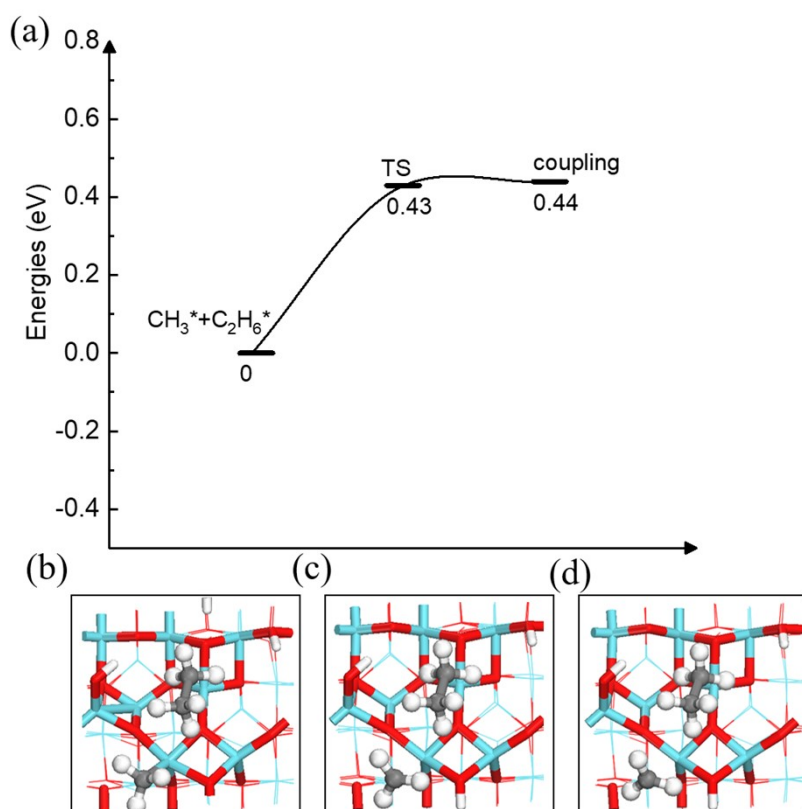

**Figure S4.** The energy diagram **(a)** for the  $\text{C}_2\text{H}_6^*$  coupling with  $\text{CH}_3^*$  reaction and corresponding structures **(b)** initial state; **(c)** transition state; **(d)** final state. (Red and blue sphere represent the O anions and Al cations respectively)

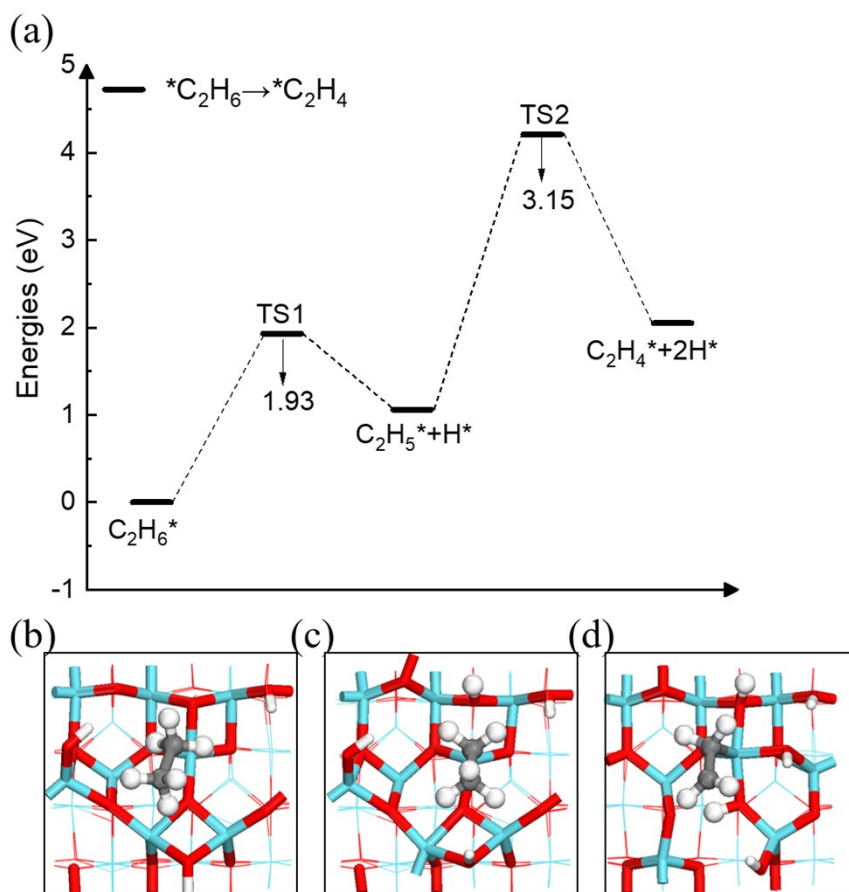

**Figure S5.** (a) The energy diagram of  $C_2H_6$  dehydrogenation process. The structures of (b)  $C_2H_6^*$ , (c)  $C_2H_5^*+H^*$ , and (d)  $C_2H_4^*+2H^*$  (Red and blue sphere represent the O anions and Al cations respectively)

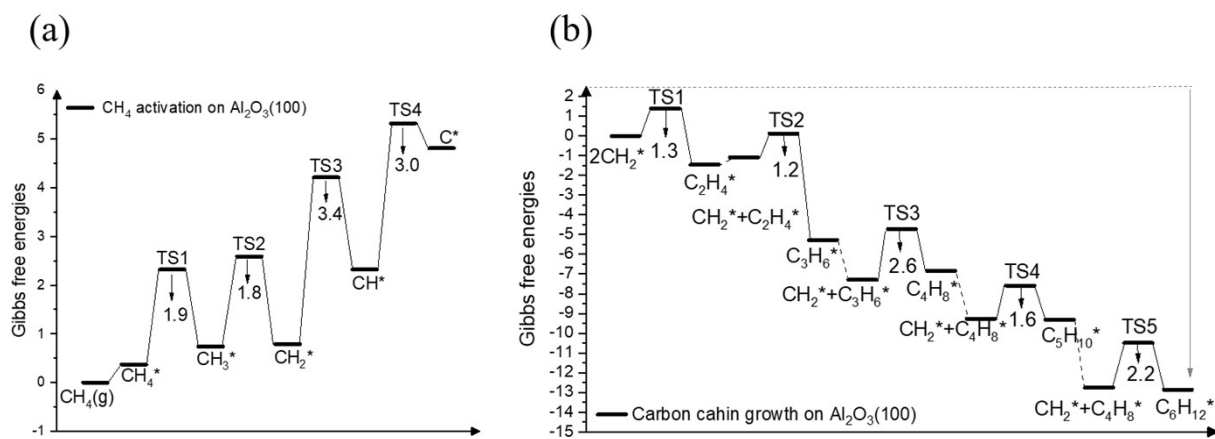

**Figure S6.** The Gibbs energy profile of the (a) complete  $CH_4^*$  dehydrogenation and (b) formation of  $C_nH_{2n}^*$  ( $n = 2-6$ ) species via  $CH_2^*$  coupling on the  $\gamma$ - $Al_2O_3$  (100) surface computed by performing frequency analysis for the intermediates and transition states at the experimental temperature of 1000K.

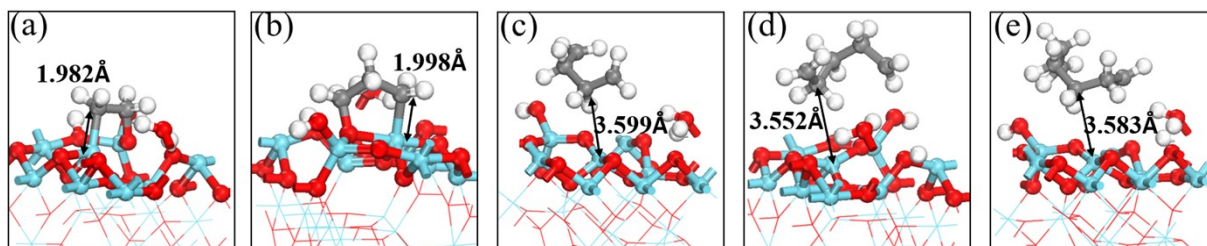

**Figure S7.** Structures and bond length between carbon end near surface and center sites of (a)  $C_2H_4^*$ , (b)  $C_3H_6^*$ , (c)  $C_4H_8^*$ , (d)  $C_5H_{10}^*$ , (e)  $C_6H_{12}^*$  on the  $\gamma-Al_2O_3(100)$  surface. (Red and blue sphere represent the O anions and Al cations respectively)

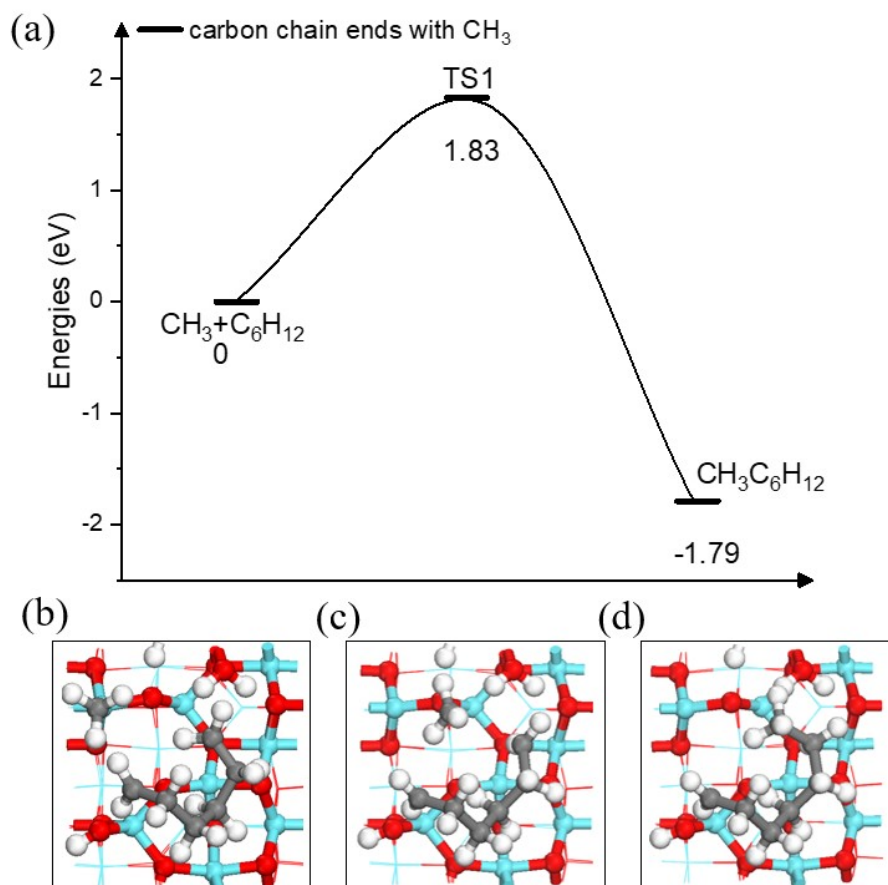

**Figure S8.** The (a) energy profiles for  $C_6H_{12}^*$  chain ends with  $CH_3^*$  and corresponding structures (b)  $C_6H_{12}^*+CH_3^*$ ; (c) TS; (d)  $CH_3C_6H_{12}^*$  on the  $\gamma-Al_2O_3(100)$  surface. (Red and blue sphere represent the O anions and Al cations respectively)



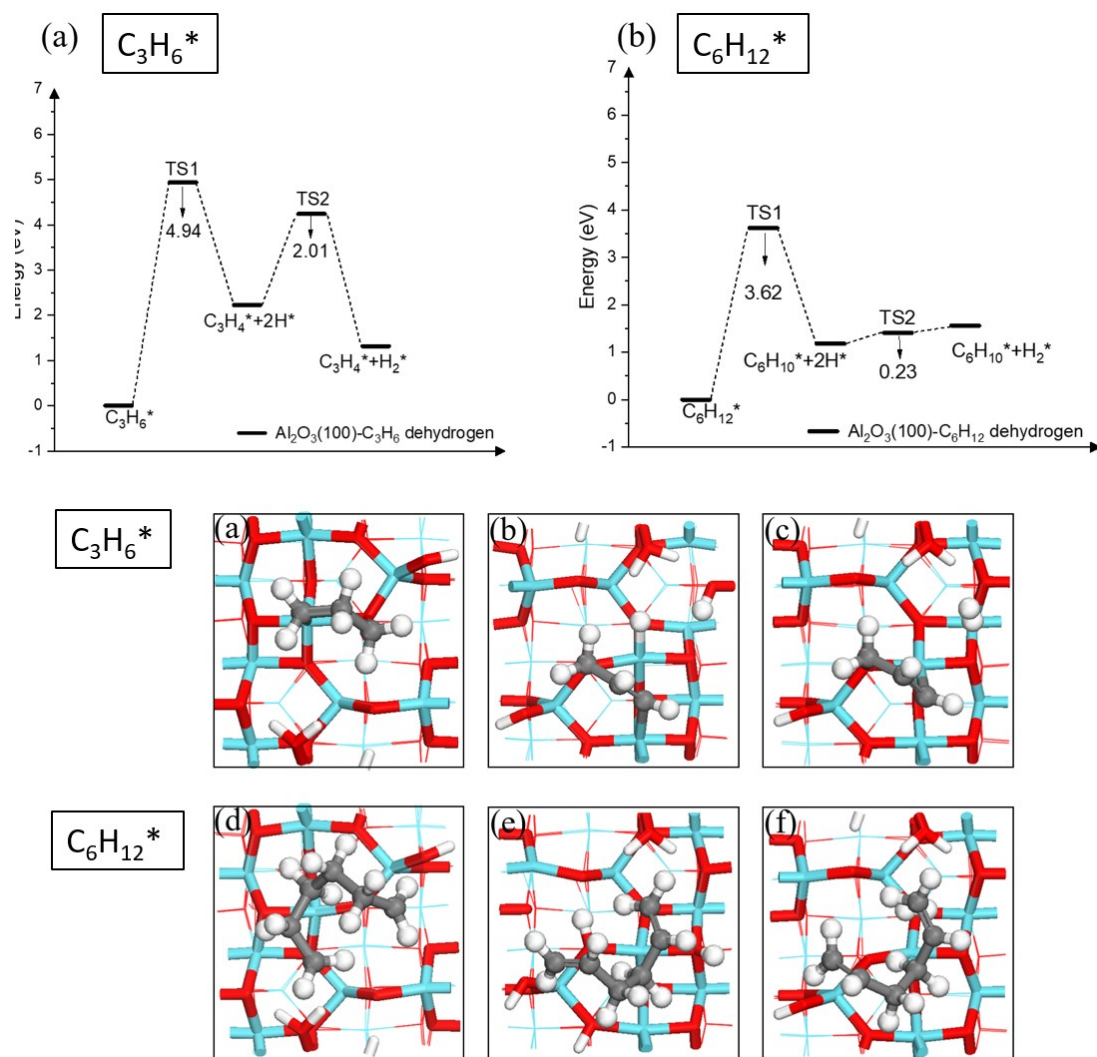

**Figure S9. Upper panel:** The energy profiles for the dehydrogenation of (a)  $C_3H_6^*$  and (b)  $C_6H_{12}^*$  on  $\gamma-Al_2O_3(100)$  via a **concerted** pathway. **Lower panel:** Structures of the intermediates during the dehydrogenation of  $C_3H_6^*$  on  $\gamma-Al_2O_3(100)$ : (a)  $C_3H_6^*$ ; (b)  $C_3H_4^* + 2H^*$ ; (c)  $C_3H_4^* + H_2^*$ . Structures during the dehydrogenation of  $C_6H_{12}^*$  on  $\gamma-Al_2O_3(100)$ : (d)  $C_6H_{12}^*$ ; (e)  $C_6H_{10}^* + 2H^*$ ; (f)  $C_6H_{10}^* + H_2^*$  (Red and blue sphere represent the O anions and Al cations respectively).

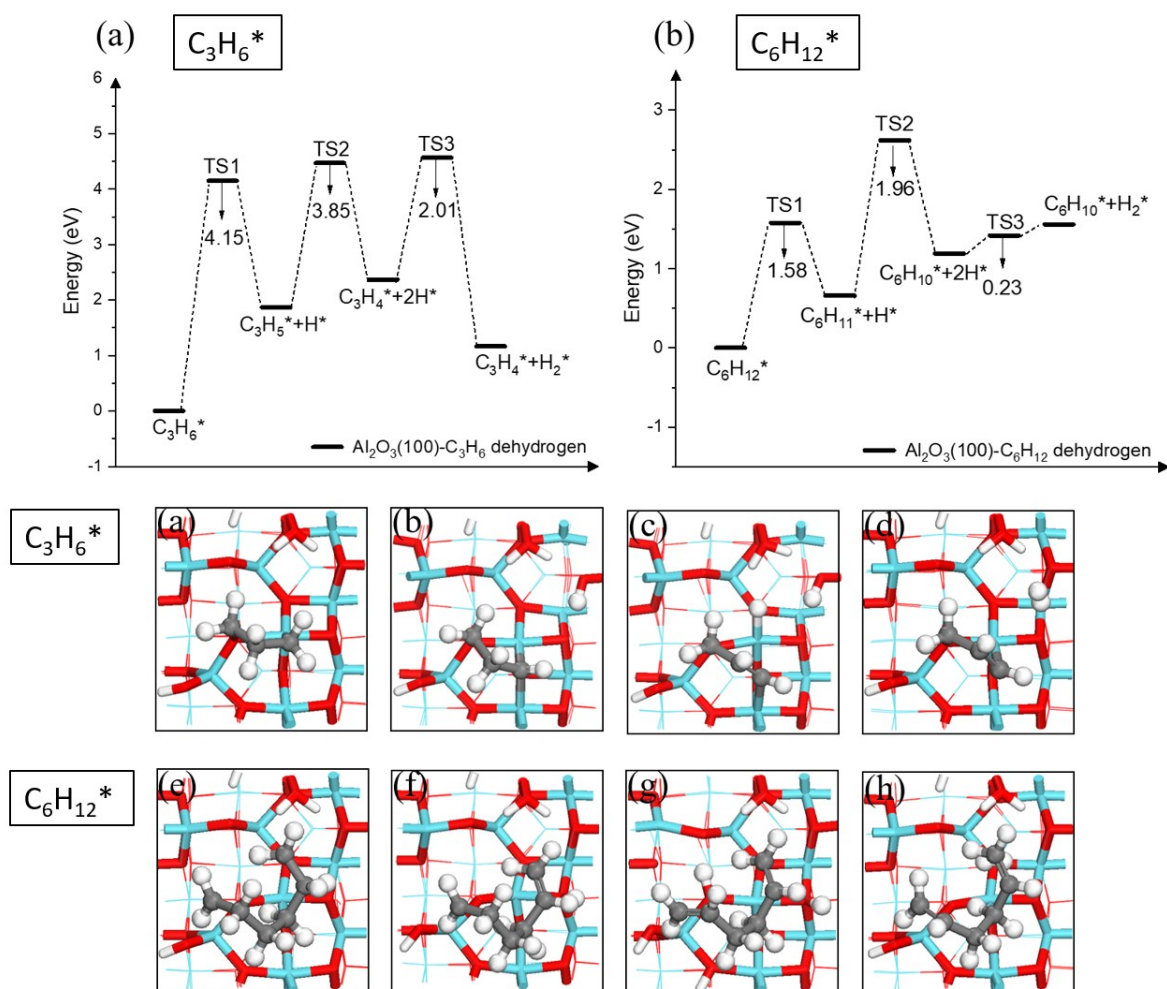

**Figure S10. Upper panel:** The energy profiles for the dehydrogenation of (a)  $\text{C}_3\text{H}_6^*$  and (b)  $\text{C}_6\text{H}_{12}^*$  on  $\gamma\text{-Al}_2\text{O}_3(100)$  via a stepwise pathway. **Lower panel:** Structures of the intermediates during the dehydrogenation of  $\text{C}_3\text{H}_6^*$  on  $\gamma\text{-Al}_2\text{O}_3(100)$ : (a)  $\text{C}_3\text{H}_6^*$ ; (b)  $\text{C}_3\text{H}_5^* + \text{H}^*$ ; (c)  $\text{C}_3\text{H}_4^* + 2\text{H}^*$ ; (d)  $\text{C}_3\text{H}_4^* + \text{H}_2^*$ . Structures during the dehydrogenation of  $\text{C}_6\text{H}_{12}^*$  on  $\gamma\text{-Al}_2\text{O}_3(100)$ : (e)  $\text{C}_6\text{H}_{12}^*$ ; (f)  $\text{C}_6\text{H}_{11}^* + \text{H}^*$ ; (g)  $\text{C}_6\text{H}_{10}^* + 2\text{H}^*$ ; (h)  $\text{C}_6\text{H}_{10}^* + \text{H}_2^*$  (Red and blue sphere represent the O anions and Al cations respectively).

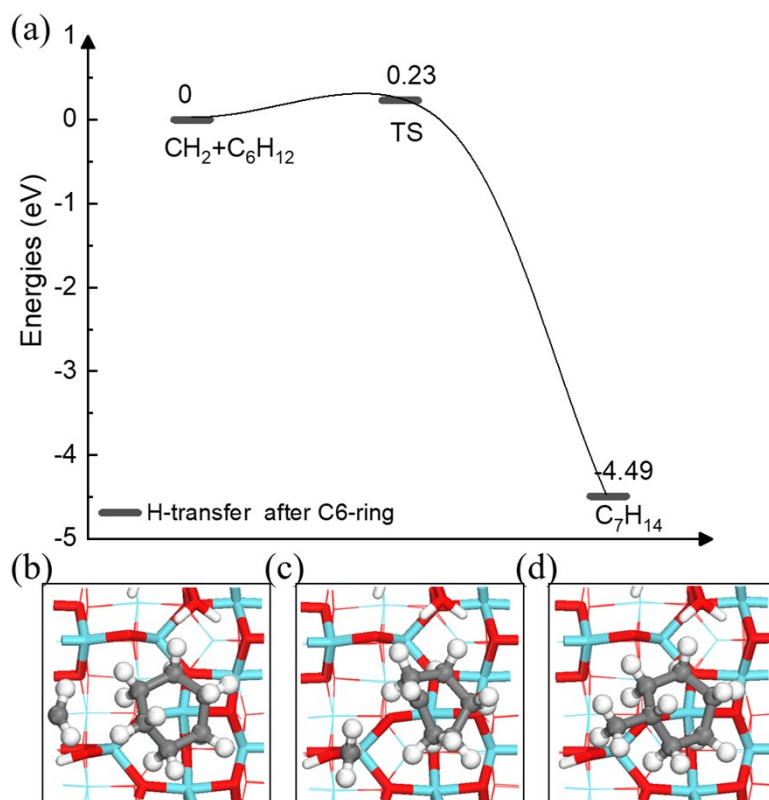

**Figure S11.** Energy diagram (a) for further H behaviour after carbon ring formation and corresponding structures (b) CH<sub>2</sub>\*+C<sub>6</sub>H<sub>12</sub>\* ring; (c) TS; (d) CH<sub>2</sub>C<sub>6</sub>H<sub>12</sub>\*. (Red and blue sphere represent the O anions and Al cations respectively).

## References

- S1 G. Paglia, C. E. Buckley, A. L. Rohl, R. D. Hart, K. Winter, A. J. Studer, B. A. Hunter and J. V. Hanna, *Chemistry of Materials*, 2004, **16**, 220-236.  
 S2. J. Gu, J. Wang and J. Leszczynski, *ACS Omega*, 2018, **3**, 1881-1888.

## S2. Optimized Structures from VASP Calculations

**Coordinates:** CH<sub>4</sub>\* adsorption on the  $\gamma$ -Al<sub>2</sub>O<sub>3</sub> (111) surface in Figure S2.

|                          |     |           |          |             |
|--------------------------|-----|-----------|----------|-------------|
| cell_length_a            |     |           |          | 10.112600   |
| cell_length_b            |     |           |          | 9.829600    |
| cell_length_c            |     |           |          | 27.073799   |
| cell_angle_alpha         |     |           |          | 90.000000   |
| cell_angle_beta          |     |           |          | 90.000000   |
| cell_angle_gamma         |     |           |          | 90.000000   |
| cell_volume              |     |           |          | 2691.211970 |
| space_group_name_H-M_alt |     |           |          | 'P 1'       |
| space_group_IT_number    |     |           |          | 1           |
| O1                       | 1.0 | 0.819257  | 0.371908 | 0.089444    |
| O2                       | 1.0 | 0.018866  | 0.664535 | 0.254293    |
| O3                       | 1.0 | 0.247982  | 0.918766 | 0.410950    |
| O4                       | 1.0 | 0.256150  | 0.287974 | 0.066855    |
| O5                       | 1.0 | 0.417984  | 0.490382 | 0.197551    |
| O6                       | 1.0 | 0.648964  | 0.698980 | 0.393103    |
| O7                       | 1.0 | 0.510751  | 0.170797 | 0.054205    |
| O8                       | 1.0 | 0.690956  | 0.468741 | 0.197851    |
| O9                       | 1.0 | 0.882188  | 0.657524 | 0.348402    |
| O10                      | 1.0 | 0.031475  | 0.394091 | 0.047973    |
| O11                      | 1.0 | 0.234296  | 0.653838 | 0.205509    |
| O12                      | 1.0 | 0.444275  | 0.853149 | 0.362310    |
| O13                      | 1.0 | 0.062191  | 0.844296 | 0.045342    |
| O14                      | 1.0 | 0.255163  | 0.131917 | 0.203636    |
| O15                      | 1.0 | 0.476393  | 0.234819 | 0.357440    |
| O16                      | 1.0 | 0.632052  | 0.657766 | 0.007201    |
| O17                      | 1.0 | 0.682432  | 0.965955 | 0.230601    |
| O18                      | 1.0 | 0.947710  | 0.120050 | 0.332579    |
| O19                      | 1.0 | 0.278992  | 0.838751 | 0.094445    |
| O20                      | 1.0 | 0.449446  | 0.032651 | 0.252297    |
| O21                      | 1.0 | 0.733193  | 0.202116 | 0.418223    |
| O22                      | 1.0 | 0.016504  | 0.134210 | 0.229462    |
| O23                      | 1.0 | 0.816621  | 0.923384 | 0.086748    |
| O24                      | 1.0 | 0.097018  | 0.519382 | 0.396076    |
| O25                      | 1.0 | 0.666423  | 0.246776 | 0.145589    |
| O26                      | 1.0 | 0.863794  | 0.446051 | 0.270107    |
| O27                      | 1.0 | -0.001652 | 0.775980 | 0.435845    |
| O28                      | 1.0 | 0.113521  | 0.593951 | 0.113528    |
| O29                      | 1.0 | 0.349496  | 0.820219 | 0.276053    |
| O30                      | 1.0 | 0.549099  | 0.990652 | 0.427082    |
| O31                      | 1.0 | 0.722533  | 0.294184 | 0.995741    |
| O32                      | 1.0 | 0.903016  | 0.588554 | 0.162489    |
| O33                      | 1.0 | 0.129342  | 0.804355 | 0.325466    |
| O34                      | 1.0 | 0.250618  | 0.041111 | 0.018704    |
| O35                      | 1.0 | 0.427240  | 0.250322 | 0.157915    |
| O36                      | 1.0 | 0.633461  | 0.477137 | 0.314429    |
| O37                      | 1.0 | 0.306843  | 0.609032 | 0.036583    |
| O38                      | 1.0 | 0.386880  | 0.855144 | 0.179233    |
| O39                      | 1.0 | 0.657349  | 0.036466 | 0.337789    |
| O40                      | 1.0 | 0.807942  | 0.845083 | 0.995227    |
| O41                      | 1.0 | 0.860213  | 0.073619 | 0.160965    |
| O42                      | 1.0 | 0.067098  | 0.350516 | 0.312745    |
| O43                      | 1.0 | 0.114343  | 0.070985 | 0.116820    |
| O44                      | 1.0 | 0.330629  | 0.308070 | 0.273145    |
| O45                      | 1.0 | 0.601661  | 0.441870 | 0.417682    |
| O46                      | 1.0 | 0.744914  | 0.788737 | 0.158743    |
| O47                      | 1.0 | 0.017405  | 0.186361 | 0.424501    |
| O48                      | 1.0 | 0.905377  | 0.920798 | 0.282566    |



|      |     |          |          |          |
|------|-----|----------|----------|----------|
| O49  | 1.0 | 0.401289 | 0.320163 | 0.988908 |
| O50  | 1.0 | 0.484915 | 0.670474 | 0.122460 |
| O51  | 1.0 | 0.656944 | 0.789661 | 0.306305 |
| O52  | 1.0 | 0.015837 | 0.297567 | 0.141734 |
| O53  | 1.0 | 0.228099 | 0.558084 | 0.295268 |
| O54  | 1.0 | 0.432439 | 0.721393 | 0.458853 |
| O55  | 1.0 | 0.563866 | 0.991304 | 0.132170 |
| O56  | 1.0 | 0.770524 | 0.216944 | 0.276530 |
| O57  | 1.0 | 0.855781 | 0.514578 | 0.450621 |
| O58  | 1.0 | 0.869470 | 0.510693 | 0.980853 |
| O59  | 1.0 | 0.015000 | 0.825938 | 0.154877 |
| O60  | 1.0 | 0.222550 | 0.060657 | 0.318060 |
| O61  | 1.0 | 0.953615 | 0.142598 | 0.037927 |
| O62  | 1.0 | 0.129259 | 0.416148 | 0.218040 |
| O63  | 1.0 | 0.406030 | 0.540192 | 0.373967 |
| O64  | 1.0 | 0.506136 | 0.456783 | 0.057786 |
| O65  | 1.0 | 0.570329 | 0.703433 | 0.221152 |
| O66  | 1.0 | 0.816329 | 0.935135 | 0.398533 |
| O67  | 1.0 | 0.875685 | 0.643125 | 0.069663 |
| O68  | 1.0 | 0.135030 | 0.911433 | 0.234294 |
| O69  | 1.0 | 0.239712 | 0.321506 | 0.375628 |
| O70  | 1.0 | 0.511349 | 0.833591 | 0.051992 |
| O71  | 1.0 | 0.558967 | 0.290535 | 0.237912 |
| O72  | 1.0 | 0.875482 | 0.365063 | 0.370093 |
| O73  | 1.0 | 0.166963 | 0.933282 | 0.510193 |
| O74  | 1.0 | 0.560651 | 0.941856 | 0.953501 |
| A11  | 1.0 | 0.182719 | 0.704565 | 0.068916 |
| A12  | 1.0 | 0.305762 | 0.958123 | 0.224179 |
| A13  | 1.0 | 0.592610 | 0.128491 | 0.389662 |
| A14  | 1.0 | 0.622508 | 0.846588 | 0.001426 |
| A15  | 1.0 | 0.715637 | 0.966361 | 0.165550 |
| A16  | 1.0 | 0.900123 | 0.290995 | 0.310459 |
| A17  | 1.0 | 0.179468 | 0.965496 | 0.069431 |
| A18  | 1.0 | 0.416232 | 0.195191 | 0.226515 |
| A19  | 1.0 | 0.522261 | 0.408669 | 0.359347 |
| A110 | 1.0 | 0.055758 | 0.033644 | 0.284755 |
| A111 | 1.0 | 0.876418 | 0.774601 | 0.115798 |
| A112 | 1.0 | 0.058477 | 0.329434 | 0.386714 |
| A113 | 1.0 | 0.568649 | 0.320331 | 0.018998 |
| A114 | 1.0 | 0.723567 | 0.639094 | 0.190576 |
| A115 | 1.0 | 0.962202 | 0.768679 | 0.307189 |
| A116 | 1.0 | 0.085172 | 0.236248 | 0.079355 |
| A117 | 1.0 | 0.290475 | 0.465413 | 0.240934 |
| A118 | 1.0 | 0.518456 | 0.609602 | 0.422376 |
| A119 | 1.0 | 0.837752 | 0.244092 | 0.136433 |
| A120 | 1.0 | 0.033392 | 0.483404 | 0.269491 |
| A121 | 1.0 | 0.122843 | 0.882074 | 0.452717 |
| A122 | 1.0 | 0.333100 | 0.432042 | 0.038209 |
| A123 | 1.0 | 0.418471 | 0.670596 | 0.184942 |
| A124 | 1.0 | 0.631148 | 0.874314 | 0.369350 |
| A125 | 1.0 | 0.533319 | 0.161082 | 0.118437 |
| A126 | 1.0 | 0.699021 | 0.378897 | 0.258644 |
| A127 | 1.0 | 0.953451 | 0.615743 | 0.412852 |
| A128 | 1.0 | 0.871831 | 0.326835 | 0.026200 |
| A129 | 1.0 | 0.068811 | 0.658453 | 0.175993 |
| A130 | 1.0 | 0.284018 | 0.894319 | 0.340115 |
| A131 | 1.0 | 0.451235 | 0.854644 | 0.114999 |
| A132 | 1.0 | 0.761791 | 0.037569 | 0.283558 |
| A133 | 1.0 | 0.771288 | 0.383199 | 0.422808 |
| A134 | 1.0 | 0.807873 | 0.660077 | 0.010311 |

|      |     |          |          |          |
|------|-----|----------|----------|----------|
| Al35 | 1.0 | 0.025954 | 0.997820 | 0.176182 |
| Al36 | 1.0 | 0.306421 | 0.217733 | 0.329200 |
| Al37 | 1.0 | 0.349857 | 0.176602 | 0.025554 |
| Al38 | 1.0 | 0.550914 | 0.371297 | 0.178914 |
| Al39 | 1.0 | 0.707901 | 0.635389 | 0.334738 |
| Al40 | 1.0 | 0.955909 | 0.495213 | 0.100750 |
| Al41 | 1.0 | 0.195044 | 0.733717 | 0.265167 |
| Al42 | 1.0 | 0.415025 | 0.875519 | 0.428115 |
| Al43 | 1.0 | 0.910657 | 0.956810 | 0.035066 |
| Al44 | 1.0 | 0.118445 | 0.247359 | 0.195999 |
| Al45 | 1.0 | 0.240286 | 0.501089 | 0.359468 |
| Al46 | 1.0 | 0.501091 | 0.642811 | 0.055719 |
| Al47 | 1.0 | 0.545320 | 0.860492 | 0.256602 |
| Al48 | 1.0 | 0.882685 | 0.107376 | 0.395867 |
| H1   | 1.0 | 0.870359 | 0.868230 | 0.417605 |
| H2   | 1.0 | 0.125096 | 0.903008 | 0.540340 |
| H3   | 1.0 | 0.808788 | 0.477272 | 0.955545 |
| H4   | 1.0 | 0.465380 | 0.945606 | 0.949755 |
| H5   | 1.0 | 0.319328 | 0.243297 | 0.519734 |
| H6   | 1.0 | 0.485666 | 0.280777 | 0.501274 |
| H7   | 1.0 | 0.360935 | 0.242692 | 0.455820 |
| H8   | 1.0 | 0.355284 | 0.399682 | 0.488716 |
| C1   | 1.0 | 0.381059 | 0.291394 | 0.491451 |

**Coordinates** of CH<sub>4</sub>\* adsorbed on the  $\gamma$ -Al<sub>2</sub>O<sub>3</sub> (110) surface in Figure S2.

|                          |     |          |          |             |
|--------------------------|-----|----------|----------|-------------|
| cell_length_a            |     |          |          | 16.049000   |
| cell_length_b            |     |          |          | 11.076900   |
| cell_length_c            |     |          |          | 24.804501   |
| cell_angle_alpha         |     |          |          | 90.000000   |
| cell_angle_beta          |     |          |          | 90.000000   |
| cell_angle_gamma         |     |          |          | 90.000000   |
| cell_volume              |     |          |          | 4409.574405 |
| space_group_name_H-M_alt |     |          |          | 'P 1'       |
| space_group_IT_number    |     |          |          | 1           |
| O1                       | 1.0 | 0.435578 | 0.189526 | 0.118153    |
| O2                       | 1.0 | 0.042305 | 0.305995 | 0.277913    |
| O3                       | 1.0 | 0.043206 | 0.306161 | 0.174324    |
| O4                       | 1.0 | 0.437983 | 0.188407 | 0.341705    |
| O5                       | 1.0 | 0.179624 | 0.440593 | 0.341802    |
| O6                       | 1.0 | 0.297707 | 0.042371 | 0.168496    |
| O7                       | 1.0 | 0.297034 | 0.040976 | 0.285385    |
| O8                       | 1.0 | 0.183196 | 0.443590 | 0.114198    |
| O9                       | 1.0 | 0.064137 | 0.065748 | 0.174203    |
| O10                      | 1.0 | 0.416571 | 0.411991 | 0.344346    |
| O11                      | 1.0 | 0.422636 | 0.415619 | 0.115715    |
| O12                      | 1.0 | 0.062212 | 0.065736 | 0.278277    |
| O13                      | 1.0 | 0.305664 | 0.307463 | 0.285654    |
| O14                      | 1.0 | 0.175562 | 0.177150 | 0.114216    |
| O15                      | 1.0 | 0.172865 | 0.179687 | 0.340945    |
| O16                      | 1.0 | 0.306551 | 0.311209 | 0.171788    |
| O17                      | 1.0 | 0.428018 | 0.181883 | 0.228600    |
| O18                      | 1.0 | 0.065898 | 0.327268 | 0.055880    |
| O19                      | 1.0 | 0.050353 | 0.331398 | 0.397720    |
| O20                      | 1.0 | 0.171047 | 0.439625 | 0.227059    |
| O21                      | 1.0 | 0.318636 | 0.043769 | 0.058829    |
| O22                      | 1.0 | 0.320757 | 0.041788 | 0.393818    |
| O23                      | 1.0 | 0.038383 | 0.073593 | 0.059541    |
| O24                      | 1.0 | 0.034476 | 0.080077 | 0.391752    |
| O25                      | 1.0 | 0.432667 | 0.421556 | 0.229814    |

|     |     |          |          |          |
|-----|-----|----------|----------|----------|
| O26 | 1.0 | 0.310052 | 0.299853 | 0.060233 |
| O27 | 1.0 | 0.303860 | 0.294009 | 0.398466 |
| O28 | 1.0 | 0.177585 | 0.177293 | 0.227298 |
| O29 | 1.0 | 0.176797 | 0.063637 | 0.440917 |
| O30 | 1.0 | 0.674751 | 0.048355 | 0.012382 |
| O31 | 1.0 | 0.946869 | 0.205104 | 0.110087 |
| O32 | 1.0 | 0.541884 | 0.298097 | 0.281224 |
| O33 | 1.0 | 0.542942 | 0.303333 | 0.175419 |
| O34 | 1.0 | 0.941012 | 0.209972 | 0.340573 |
| O35 | 1.0 | 0.683120 | 0.440601 | 0.342563 |
| O36 | 1.0 | 0.795225 | 0.044186 | 0.169712 |
| O37 | 1.0 | 0.797511 | 0.046875 | 0.283110 |
| O38 | 1.0 | 0.679902 | 0.438283 | 0.120128 |
| O39 | 1.0 | 0.561898 | 0.063024 | 0.175380 |
| O40 | 1.0 | 0.917150 | 0.425603 | 0.338153 |
| O41 | 1.0 | 0.911585 | 0.414630 | 0.108958 |
| O42 | 1.0 | 0.564240 | 0.062903 | 0.280493 |
| O43 | 1.0 | 0.807133 | 0.319758 | 0.282750 |
| O44 | 1.0 | 0.668000 | 0.171912 | 0.113400 |
| O45 | 1.0 | 0.672520 | 0.178432 | 0.341063 |
| O46 | 1.0 | 0.805966 | 0.314932 | 0.167002 |
| O47 | 1.0 | 0.925849 | 0.190431 | 0.225241 |
| O48 | 1.0 | 0.544714 | 0.308179 | 0.065730 |
| O49 | 1.0 | 0.545922 | 0.303778 | 0.396901 |
| O50 | 1.0 | 0.672617 | 0.435784 | 0.229996 |
| O51 | 1.0 | 0.822635 | 0.062791 | 0.061646 |
| O52 | 1.0 | 0.825950 | 0.060711 | 0.391463 |
| O53 | 1.0 | 0.528817 | 0.060384 | 0.064359 |
| O54 | 1.0 | 0.535388 | 0.057176 | 0.391337 |
| O55 | 1.0 | 0.932005 | 0.430746 | 0.224593 |
| O56 | 1.0 | 0.770081 | 0.307776 | 0.047088 |
| O57 | 1.0 | 0.809312 | 0.310257 | 0.397385 |
| O58 | 1.0 | 0.677003 | 0.176135 | 0.226770 |
| O59 | 1.0 | 0.441393 | 0.698264 | 0.113000 |
| O60 | 1.0 | 0.042834 | 0.805179 | 0.278714 |
| O61 | 1.0 | 0.041619 | 0.804170 | 0.174629 |
| O62 | 1.0 | 0.446178 | 0.693295 | 0.341942 |
| O63 | 1.0 | 0.180849 | 0.946103 | 0.341002 |
| O64 | 1.0 | 0.299281 | 0.545169 | 0.169589 |
| O65 | 1.0 | 0.296399 | 0.541425 | 0.286212 |
| O66 | 1.0 | 0.180701 | 0.940759 | 0.113120 |
| O67 | 1.0 | 0.062561 | 0.569004 | 0.173377 |
| O68 | 1.0 | 0.414500 | 0.904865 | 0.344545 |
| O69 | 1.0 | 0.413085 | 0.911109 | 0.112486 |
| O70 | 1.0 | 0.061104 | 0.565526 | 0.278271 |
| O71 | 1.0 | 0.306577 | 0.804641 | 0.286408 |
| O72 | 1.0 | 0.173342 | 0.679683 | 0.113294 |
| O73 | 1.0 | 0.171744 | 0.677535 | 0.340337 |
| O74 | 1.0 | 0.306790 | 0.807524 | 0.172041 |
| O75 | 1.0 | 0.427910 | 0.680621 | 0.227845 |
| O76 | 1.0 | 0.045178 | 0.818629 | 0.059643 |
| O77 | 1.0 | 0.048623 | 0.830160 | 0.395559 |
| O78 | 1.0 | 0.171976 | 0.937358 | 0.227155 |
| O79 | 1.0 | 0.323991 | 0.544256 | 0.061280 |
| O80 | 1.0 | 0.320609 | 0.548799 | 0.394292 |
| O81 | 1.0 | 0.032278 | 0.569802 | 0.062303 |
| O82 | 1.0 | 0.033428 | 0.579298 | 0.392233 |
| O83 | 1.0 | 0.433738 | 0.922701 | 0.228006 |
| O84 | 1.0 | 0.303048 | 0.791364 | 0.057028 |
| O85 | 1.0 | 0.270093 | 0.799439 | 0.404743 |

|      |     |          |          |          |
|------|-----|----------|----------|----------|
| O86  | 1.0 | 0.177079 | 0.676828 | 0.227447 |
| O87  | 1.0 | 0.933489 | 0.699251 | 0.112753 |
| O88  | 1.0 | 0.542921 | 0.798655 | 0.278948 |
| O89  | 1.0 | 0.541979 | 0.797281 | 0.174391 |
| O90  | 1.0 | 0.937136 | 0.706001 | 0.340609 |
| O91  | 1.0 | 0.686378 | 0.945073 | 0.340106 |
| O92  | 1.0 | 0.795802 | 0.563557 | 0.168808 |
| O93  | 1.0 | 0.795636 | 0.560663 | 0.286008 |
| O94  | 1.0 | 0.682604 | 0.942059 | 0.112100 |
| O95  | 1.0 | 0.561025 | 0.545504 | 0.175433 |
| O96  | 1.0 | 0.919089 | 0.928325 | 0.335965 |
| O97  | 1.0 | 0.917997 | 0.928484 | 0.115259 |
| O98  | 1.0 | 0.561426 | 0.559077 | 0.280232 |
| O99  | 1.0 | 0.804690 | 0.803169 | 0.285842 |
| O100 | 1.0 | 0.672015 | 0.676873 | 0.118906 |
| O101 | 1.0 | 0.674335 | 0.675017 | 0.336265 |
| O102 | 1.0 | 0.804372 | 0.803941 | 0.167179 |
| O103 | 1.0 | 0.926032 | 0.690779 | 0.226893 |
| O104 | 1.0 | 0.550957 | 0.817748 | 0.053398 |
| O105 | 1.0 | 0.563397 | 0.811354 | 0.396517 |
| O106 | 1.0 | 0.670688 | 0.935753 | 0.226804 |
| O107 | 1.0 | 0.815527 | 0.559111 | 0.065759 |
| O108 | 1.0 | 0.820779 | 0.563837 | 0.387395 |
| O109 | 1.0 | 0.537179 | 0.560930 | 0.068065 |
| O110 | 1.0 | 0.536959 | 0.562286 | 0.393521 |
| O111 | 1.0 | 0.930920 | 0.927723 | 0.226047 |
| O112 | 1.0 | 0.809891 | 0.809469 | 0.062339 |
| O113 | 1.0 | 0.811978 | 0.812128 | 0.390610 |
| O114 | 1.0 | 0.672607 | 0.673774 | 0.227250 |
| A11  | 1.0 | 0.290889 | 0.417296 | 0.343529 |
| A12  | 1.0 | 0.183882 | 0.059155 | 0.167820 |
| A13  | 1.0 | 0.182645 | 0.061443 | 0.286344 |
| A14  | 1.0 | 0.293491 | 0.420160 | 0.113533 |
| A15  | 1.0 | 0.417925 | 0.300995 | 0.172946 |
| A16  | 1.0 | 0.065050 | 0.218402 | 0.344212 |
| A17  | 1.0 | 0.067124 | 0.210606 | 0.109409 |
| A18  | 1.0 | 0.417961 | 0.299371 | 0.285867 |
| A19  | 1.0 | 0.054545 | 0.438411 | 0.225315 |
| A110 | 1.0 | 0.421554 | 0.053419 | 0.082717 |
| A111 | 1.0 | 0.426250 | 0.046590 | 0.374414 |
| A112 | 1.0 | 0.239690 | 0.311075 | 0.228367 |
| A113 | 1.0 | 0.249821 | 0.167082 | 0.062044 |
| A114 | 1.0 | 0.245936 | 0.157790 | 0.394216 |
| A115 | 1.0 | 0.054735 | 0.183923 | 0.226196 |
| A116 | 1.0 | 0.427085 | 0.300917 | 0.056500 |
| A117 | 1.0 | 0.421188 | 0.298516 | 0.401227 |
| A118 | 1.0 | 0.122984 | 0.472824 | 0.053489 |
| A119 | 1.0 | 0.115538 | 0.469529 | 0.401332 |
| A120 | 1.0 | 0.359258 | 0.048723 | 0.227278 |
| A121 | 1.0 | 0.798382 | 0.935447 | 0.341636 |
| A122 | 1.0 | 0.680431 | 0.556683 | 0.171406 |
| A123 | 1.0 | 0.678458 | 0.554096 | 0.285506 |
| A124 | 1.0 | 0.796593 | 0.934546 | 0.111045 |
| A125 | 1.0 | 0.924173 | 0.809690 | 0.169891 |
| A126 | 1.0 | 0.565108 | 0.697808 | 0.342868 |
| A127 | 1.0 | 0.564800 | 0.706612 | 0.104996 |
| A128 | 1.0 | 0.924801 | 0.810451 | 0.282200 |
| A129 | 1.0 | 0.552433 | 0.928675 | 0.227925 |
| A130 | 1.0 | 0.925985 | 0.555242 | 0.078592 |
| A131 | 1.0 | 0.929846 | 0.562658 | 0.373044 |

|      |     |          |          |          |
|------|-----|----------|----------|----------|
| A132 | 1.0 | 0.737505 | 0.805971 | 0.226412 |
| A133 | 1.0 | 0.780366 | 0.686631 | 0.105593 |
| A134 | 1.0 | 0.782230 | 0.689686 | 0.347839 |
| A135 | 1.0 | 0.549219 | 0.676726 | 0.226225 |
| A136 | 1.0 | 0.927430 | 0.818643 | 0.055070 |
| A137 | 1.0 | 0.928833 | 0.822926 | 0.399291 |
| A138 | 1.0 | 0.608389 | 0.952079 | 0.058732 |
| A139 | 1.0 | 0.616481 | 0.949845 | 0.394388 |
| A140 | 1.0 | 0.861782 | 0.558225 | 0.226668 |
| A141 | 1.0 | 0.795931 | 0.424803 | 0.343220 |
| A142 | 1.0 | 0.681200 | 0.057090 | 0.167919 |
| A143 | 1.0 | 0.683100 | 0.060882 | 0.285490 |
| A144 | 1.0 | 0.788881 | 0.416767 | 0.106260 |
| A145 | 1.0 | 0.921628 | 0.308396 | 0.166209 |
| A146 | 1.0 | 0.559066 | 0.187522 | 0.343893 |
| A147 | 1.0 | 0.555737 | 0.182265 | 0.112776 |
| A148 | 1.0 | 0.921876 | 0.311039 | 0.281445 |
| A149 | 1.0 | 0.551317 | 0.427995 | 0.231742 |
| A150 | 1.0 | 0.931182 | 0.066714 | 0.078275 |
| A151 | 1.0 | 0.931877 | 0.066749 | 0.369179 |
| A152 | 1.0 | 0.742116 | 0.307748 | 0.225283 |
| A153 | 1.0 | 0.734185 | 0.156579 | 0.057422 |
| A154 | 1.0 | 0.751567 | 0.176603 | 0.390720 |
| A155 | 1.0 | 0.552274 | 0.179279 | 0.228128 |
| A156 | 1.0 | 0.956021 | 0.317780 | 0.040986 |
| A157 | 1.0 | 0.932188 | 0.321762 | 0.399226 |
| A158 | 1.0 | 0.574231 | 0.433986 | 0.104611 |
| A159 | 1.0 | 0.597689 | 0.436074 | 0.384489 |
| A160 | 1.0 | 0.861819 | 0.057699 | 0.225611 |
| A161 | 1.0 | 0.290965 | 0.911700 | 0.343520 |
| A162 | 1.0 | 0.184618 | 0.562866 | 0.167038 |
| A163 | 1.0 | 0.181272 | 0.558900 | 0.287545 |
| A164 | 1.0 | 0.290039 | 0.907820 | 0.111898 |
| A165 | 1.0 | 0.419766 | 0.801201 | 0.170792 |
| A166 | 1.0 | 0.063572 | 0.708829 | 0.344619 |
| A167 | 1.0 | 0.062291 | 0.697493 | 0.110446 |
| A168 | 1.0 | 0.420378 | 0.799218 | 0.286496 |
| A169 | 1.0 | 0.055658 | 0.937910 | 0.226305 |
| A170 | 1.0 | 0.426932 | 0.558184 | 0.082149 |
| A171 | 1.0 | 0.425616 | 0.557916 | 0.375211 |
| A172 | 1.0 | 0.240920 | 0.808251 | 0.228946 |
| A173 | 1.0 | 0.240075 | 0.652395 | 0.053624 |
| A174 | 1.0 | 0.229693 | 0.641644 | 0.402333 |
| A175 | 1.0 | 0.056296 | 0.683773 | 0.226905 |
| A176 | 1.0 | 0.419496 | 0.802578 | 0.052899 |
| A177 | 1.0 | 0.451085 | 0.805271 | 0.411586 |
| A178 | 1.0 | 0.107881 | 0.950609 | 0.060367 |
| A179 | 1.0 | 0.110287 | 0.964399 | 0.394174 |
| A180 | 1.0 | 0.359070 | 0.549369 | 0.228640 |
| H1   | 1.0 | 0.140275 | 0.106158 | 0.465877 |
| H2   | 1.0 | 0.309453 | 0.817019 | 0.434522 |
| H3   | 1.0 | 0.715165 | 0.005115 | 0.990182 |
| H4   | 1.0 | 0.819287 | 0.315095 | 0.021612 |
| H5   | 1.0 | 0.610510 | 0.390681 | 0.516374 |
| H6   | 1.0 | 0.635538 | 0.545346 | 0.500640 |
| H7   | 1.0 | 0.714141 | 0.447304 | 0.527560 |
| H8   | 1.0 | 0.681067 | 0.423561 | 0.461436 |
| C1   | 1.0 | 0.658768 | 0.452427 | 0.501730 |



**Coordinates of CH<sub>4</sub>\* adsorbed on the  $\gamma$ -Al<sub>2</sub>O<sub>3</sub> (100) surface in Figure S2.**

|                          |             |          |          |          |
|--------------------------|-------------|----------|----------|----------|
| cell_length_a            | 8.070750    |          |          |          |
| cell_length_b            | 8.404430    |          |          |          |
| cell_length_c            | 26.383160   |          |          |          |
| cell_angle_alpha         | 90.000000   |          |          |          |
| cell_angle_beta          | 90.000000   |          |          |          |
| cell_angle_gamma         | 90.000000   |          |          |          |
| cell_volume              | 1789.571263 |          |          |          |
| space_group_name_H-M_alt | 'P 1'       |          |          |          |
| space_group_IT_number    | 1           |          |          |          |
| H1                       | 1.0         | 0.011995 | 0.411980 | 0.458362 |
| H2                       | 1.0         | 0.388516 | 0.757855 | 0.967723 |
| H3                       | 1.0         | 0.701996 | 0.310403 | 0.531470 |
| H4                       | 1.0         | 0.739848 | 0.517488 | 0.518411 |
| H5                       | 1.0         | 0.531436 | 0.443476 | 0.521332 |
| H6                       | 1.0         | 0.651554 | 0.458819 | 0.577695 |
| H7                       | 1.0         | 0.864255 | 0.321243 | 0.970611 |
| H8                       | 1.0         | 0.749368 | 0.868595 | 0.498552 |
| C1                       | 1.0         | 0.656831 | 0.432299 | 0.537025 |
| O1                       | 1.0         | 0.110355 | 0.590023 | 0.157307 |
| O2                       | 1.0         | 0.127574 | 0.579320 | 0.367007 |
| O3                       | 1.0         | 0.616367 | 0.906845 | 0.048312 |
| O4                       | 1.0         | 0.618793 | 0.916997 | 0.260781 |
| O5                       | 1.0         | 0.842993 | 0.412690 | 0.993249 |
| O6                       | 1.0         | 0.862823 | 0.412072 | 0.207481 |
| O7                       | 1.0         | 0.830288 | 0.416327 | 0.419013 |
| O8                       | 1.0         | 0.367782 | 0.101448 | 0.096769 |
| O9                       | 1.0         | 0.363075 | 0.085601 | 0.313034 |
| O10                      | 1.0         | 0.909850 | 0.096841 | 0.108340 |
| O11                      | 1.0         | 0.901975 | 0.110546 | 0.320052 |
| O12                      | 1.0         | 0.418243 | 0.424242 | 0.999535 |
| O13                      | 1.0         | 0.396020 | 0.420990 | 0.210599 |
| O14                      | 1.0         | 0.401479 | 0.440688 | 0.423466 |
| O15                      | 1.0         | 0.158528 | 0.913090 | 0.060366 |
| O16                      | 1.0         | 0.152330 | 0.907300 | 0.268427 |
| O17                      | 1.0         | 0.643793 | 0.580283 | 0.158147 |
| O18                      | 1.0         | 0.638861 | 0.601021 | 0.369084 |
| O19                      | 1.0         | 0.906940 | 0.403539 | 0.107200 |
| O20                      | 1.0         | 0.907963 | 0.412418 | 0.322125 |
| O21                      | 1.0         | 0.421012 | 0.084471 | 0.000490 |
| O22                      | 1.0         | 0.396501 | 0.084787 | 0.212795 |
| O23                      | 1.0         | 0.425799 | 0.132068 | 0.443652 |
| O24                      | 1.0         | 0.156529 | 0.596839 | 0.059345 |
| O25                      | 1.0         | 0.156970 | 0.596681 | 0.269381 |
| O26                      | 1.0         | 0.643594 | 0.920681 | 0.159702 |
| O27                      | 1.0         | 0.647280 | 0.915096 | 0.384065 |
| O28                      | 1.0         | 0.112204 | 0.911557 | 0.158119 |
| O29                      | 1.0         | 0.103082 | 0.923220 | 0.366950 |
| O30                      | 1.0         | 0.616698 | 0.602830 | 0.047033 |
| O31                      | 1.0         | 0.618404 | 0.589566 | 0.258341 |
| O32                      | 1.0         | 0.845029 | 0.117150 | 0.998252 |
| O33                      | 1.0         | 0.863178 | 0.090741 | 0.207056 |
| O34                      | 1.0         | 0.847355 | 0.094149 | 0.425274 |
| O35                      | 1.0         | 0.366119 | 0.408225 | 0.095512 |
| O36                      | 1.0         | 0.369909 | 0.411785 | 0.310746 |
| O37                      | 1.0         | 0.137682 | 0.252628 | 0.157589 |
| O38                      | 1.0         | 0.140569 | 0.251312 | 0.371687 |
| O39                      | 1.0         | 0.638326 | 0.257541 | 0.057404 |
| O40                      | 1.0         | 0.647067 | 0.253191 | 0.260571 |

|      |     |          |          |           |
|------|-----|----------|----------|-----------|
| O41  | 1.0 | 0.890991 | 0.752512 | 0.109077  |
| O42  | 1.0 | 0.894782 | 0.740319 | 0.320262  |
| O43  | 1.0 | 0.330025 | 0.755498 | -0.000068 |
| O44  | 1.0 | 0.363326 | 0.752439 | 0.213206  |
| O45  | 1.0 | 0.355803 | 0.754586 | 0.425805  |
| O46  | 1.0 | 0.900105 | 0.756489 | 0.999731  |
| O47  | 1.0 | 0.894823 | 0.750912 | 0.210329  |
| O48  | 1.0 | 0.916333 | 0.729148 | 0.424727  |
| O49  | 1.0 | 0.383126 | 0.753032 | 0.104044  |
| O50  | 1.0 | 0.382787 | 0.755529 | 0.316090  |
| O51  | 1.0 | 0.122474 | 0.255618 | 0.053593  |
| O52  | 1.0 | 0.114414 | 0.257124 | 0.266400  |
| O53  | 1.0 | 0.645264 | 0.251118 | 0.163344  |
| O54  | 1.0 | 0.633729 | 0.259415 | 0.366352  |
| O55  | 1.0 | 0.134978 | 0.417864 | 0.462110  |
| O56  | 1.0 | 0.649978 | 0.933993 | 0.498296  |
| Al1  | 1.0 | 0.393827 | 0.924909 | 0.055948  |
| Al2  | 1.0 | 0.388279 | 0.925025 | 0.268401  |
| Al3  | 1.0 | 0.137210 | 0.423706 | 0.111502  |
| Al4  | 1.0 | 0.141260 | 0.417668 | 0.320981  |
| Al5  | 1.0 | 0.637077 | 0.428391 | 0.013607  |
| Al6  | 1.0 | 0.622266 | 0.427525 | 0.213232  |
| Al7  | 1.0 | 0.608572 | 0.429243 | 0.405775  |
| Al8  | 1.0 | 0.869882 | 0.920728 | 0.162404  |
| Al9  | 1.0 | 0.888687 | 0.909175 | 0.393135  |
| Al10 | 1.0 | 0.643419 | 0.078865 | 0.013214  |
| Al11 | 1.0 | 0.625276 | 0.075739 | 0.214196  |
| Al12 | 1.0 | 0.617303 | 0.033912 | 0.441223  |
| Al13 | 1.0 | 0.869510 | 0.582630 | 0.161945  |
| Al14 | 1.0 | 0.870450 | 0.590419 | 0.375990  |
| Al15 | 1.0 | 0.391889 | 0.585678 | 0.054972  |
| Al16 | 1.0 | 0.392415 | 0.581705 | 0.269190  |
| Al17 | 1.0 | 0.140791 | 0.079366 | 0.113529  |
| Al18 | 1.0 | 0.131958 | 0.082379 | 0.323834  |
| Al19 | 1.0 | 0.896264 | 0.242999 | 0.053073  |
| Al20 | 1.0 | 0.880673 | 0.261988 | 0.272415  |
| Al21 | 1.0 | 0.506331 | 0.256924 | 0.115619  |
| Al22 | 1.0 | 0.502555 | 0.244628 | 0.315852  |
| Al23 | 1.0 | 0.882906 | 0.251160 | 0.161435  |
| Al24 | 1.0 | 0.865463 | 0.243667 | 0.376900  |
| Al25 | 1.0 | 0.101850 | 0.757194 | 0.015675  |
| Al26 | 1.0 | 0.130473 | 0.750847 | 0.221439  |
| Al27 | 1.0 | 0.233448 | 0.589176 | 0.428065  |
| Al28 | 1.0 | 0.514249 | 0.750595 | 0.164254  |
| Al29 | 1.0 | 0.500707 | 0.763878 | 0.377911  |
| Al30 | 1.0 | 0.138870 | 0.751935 | 0.113515  |
| Al31 | 1.0 | 0.130781 | 0.757184 | 0.325564  |
| Al32 | 1.0 | 0.768441 | 0.755528 | 0.052162  |
| Al33 | 1.0 | 0.753796 | 0.752181 | 0.270864  |
| Al34 | 1.0 | 0.324773 | 0.254093 | 0.029223  |
| Al35 | 1.0 | 0.265788 | 0.253636 | 0.218239  |
| Al36 | 1.0 | 0.274648 | 0.266707 | 0.429159  |

**Coordinates** of CH<sub>4</sub>\* adsorbed on the  $\gamma$ -Al<sub>2</sub>O<sub>3</sub> (001) surface in Figure S2.

|                  |           |
|------------------|-----------|
| cell_length_a    | 11.076900 |
| cell_length_b    | 8.346800  |
| cell_length_c    | 26.206800 |
| cell_angle_alpha | 90.000000 |
| cell_angle_beta  | 90.000000 |

|                          |     |             |          |          |
|--------------------------|-----|-------------|----------|----------|
| cell_angle_gamma         |     | 90.000000   |          |          |
| cell_volume              |     | 2422.993327 |          |          |
| space_group_name_H-M_alt |     | 'P 1'       |          |          |
| space_group_IT_number    |     | 1           |          |          |
| O1                       | 1.0 | 0.197385    | 0.403294 | 0.121937 |
| O2                       | 1.0 | 0.203463    | 0.394172 | 0.430501 |
| O3                       | 1.0 | 0.308883    | 0.902940 | 0.184585 |
| O4                       | 1.0 | 0.308845    | 0.592514 | 0.184394 |
| O5                       | 1.0 | 0.197954    | 0.090600 | 0.121867 |
| O6                       | 1.0 | 0.203928    | 0.090638 | 0.430269 |
| O7                       | 1.0 | 0.448244    | 0.082092 | 0.270446 |
| O8                       | 1.0 | 0.056539    | 0.597191 | 0.026875 |
| O9                       | 1.0 | 0.045917    | 0.572461 | 0.340170 |
| O10                      | 1.0 | 0.056279    | 0.896614 | 0.026744 |
| O11                      | 1.0 | 0.048177    | 0.903293 | 0.343229 |
| O12                      | 1.0 | 0.448559    | 0.418511 | 0.270172 |
| O13                      | 1.0 | 0.072532    | 0.591392 | 0.196025 |
| O14                      | 1.0 | 0.430855    | 0.085588 | 0.109248 |
| O15                      | 1.0 | 0.439357    | 0.099896 | 0.415889 |
| O16                      | 1.0 | 0.430610    | 0.409476 | 0.109388 |
| O17                      | 1.0 | 0.435371    | 0.405229 | 0.416292 |
| O18                      | 1.0 | 0.071915    | 0.905025 | 0.196994 |
| O19                      | 1.0 | 0.305317    | 0.901875 | 0.039729 |
| O20                      | 1.0 | 0.312169    | 0.919743 | 0.345250 |
| O21                      | 1.0 | 0.184349    | 0.417198 | 0.263877 |
| O22                      | 1.0 | 0.181865    | 0.078525 | 0.265084 |
| O23                      | 1.0 | 0.305378    | 0.592545 | 0.039956 |
| O24                      | 1.0 | 0.312132    | 0.575644 | 0.345220 |
| O25                      | 1.0 | 0.199460    | 0.747784 | 0.112985 |
| O26                      | 1.0 | 0.174190    | 0.738943 | 0.420711 |
| O27                      | 1.0 | 0.312595    | 0.247388 | 0.190775 |
| O28                      | 1.0 | 0.443970    | 0.748974 | 0.262382 |
| O29                      | 1.0 | 0.079707    | 0.246722 | 0.042174 |
| O30                      | 1.0 | 0.059470    | 0.251361 | 0.348589 |
| O31                      | 1.0 | 0.073651    | 0.244351 | 0.188364 |
| O32                      | 1.0 | 0.437801    | 0.747586 | 0.118126 |
| O33                      | 1.0 | 0.398686    | 0.748849 | 0.425208 |
| O34                      | 1.0 | 0.323910    | 0.247462 | 0.035712 |
| O35                      | 1.0 | 0.320387    | 0.248555 | 0.344164 |
| O36                      | 1.0 | 0.181233    | 0.747178 | 0.266253 |
| O37                      | 1.0 | 0.701140    | 0.401631 | 0.117885 |
| O38                      | 1.0 | 0.704553    | 0.405646 | 0.428426 |
| O39                      | 1.0 | 0.807867    | 0.905015 | 0.183338 |
| O40                      | 1.0 | 0.807893    | 0.590411 | 0.183348 |
| O41                      | 1.0 | 0.700375    | 0.092338 | 0.117499 |
| O42                      | 1.0 | 0.693383    | 0.110586 | 0.428589 |
| O43                      | 1.0 | 0.945227    | 0.075786 | 0.274027 |
| O44                      | 1.0 | 0.525267    | 0.596238 | 0.026960 |
| O45                      | 1.0 | 0.548931    | 0.586363 | 0.341678 |
| O46                      | 1.0 | 0.525897    | 0.899353 | 0.027637 |
| O47                      | 1.0 | 0.548148    | 0.916054 | 0.340923 |
| O48                      | 1.0 | 0.947952    | 0.412881 | 0.266908 |
| O49                      | 1.0 | 0.573935    | 0.591234 | 0.196673 |
| O50                      | 1.0 | 0.940449    | 0.091386 | 0.109535 |
| O51                      | 1.0 | 0.939837    | 0.097677 | 0.416101 |
| O52                      | 1.0 | 0.940803    | 0.401568 | 0.109772 |
| O53                      | 1.0 | 0.952024    | 0.375363 | 0.436880 |
| O54                      | 1.0 | 0.573742    | 0.906022 | 0.196518 |
| O55                      | 1.0 | 0.834886    | 0.917142 | 0.041316 |
| O56                      | 1.0 | 0.813976    | 0.909568 | 0.354451 |

|      |     |          |          |          |
|------|-----|----------|----------|----------|
| O57  | 1.0 | 0.684353 | 0.415224 | 0.263246 |
| O58  | 1.0 | 0.685432 | 0.079866 | 0.264138 |
| O59  | 1.0 | 0.835247 | 0.576334 | 0.041571 |
| O60  | 1.0 | 0.809412 | 0.569400 | 0.342594 |
| O61  | 1.0 | 0.693803 | 0.747143 | 0.113040 |
| O62  | 1.0 | 0.667150 | 0.752187 | 0.420802 |
| O63  | 1.0 | 0.810797 | 0.244475 | 0.190699 |
| O64  | 1.0 | 0.941959 | 0.747453 | 0.262244 |
| O65  | 1.0 | 0.548655 | 0.248020 | 0.041025 |
| O66  | 1.0 | 0.560338 | 0.253587 | 0.346305 |
| O67  | 1.0 | 0.573089 | 0.247648 | 0.184329 |
| O68  | 1.0 | 0.926625 | 0.747479 | 0.116189 |
| O69  | 1.0 | 0.910821 | 0.681562 | 0.426302 |
| O70  | 1.0 | 0.860949 | 0.246973 | 0.031499 |
| O71  | 1.0 | 0.822990 | 0.251769 | 0.346675 |
| O72  | 1.0 | 0.683478 | 0.750461 | 0.266668 |
| O73  | 1.0 | 0.359662 | 0.760837 | 0.943739 |
| O74  | 1.0 | 0.815916 | 0.920266 | 0.491672 |
| A11  | 1.0 | 0.438763 | 0.080682 | 0.038191 |
| A12  | 1.0 | 0.434604 | 0.074146 | 0.340912 |
| A13  | 1.0 | 0.066046 | 0.574404 | 0.269985 |
| A14  | 1.0 | 0.064842 | 0.918936 | 0.272791 |
| A15  | 1.0 | 0.438260 | 0.414750 | 0.038444 |
| A16  | 1.0 | 0.435117 | 0.425242 | 0.340205 |
| A17  | 1.0 | 0.312889 | 0.577056 | 0.112370 |
| A18  | 1.0 | 0.288385 | 0.578805 | 0.413500 |
| A19  | 1.0 | 0.195140 | 0.074940 | 0.196076 |
| A110 | 1.0 | 0.194847 | 0.419172 | 0.195232 |
| A111 | 1.0 | 0.312922 | 0.918274 | 0.112280 |
| A112 | 1.0 | 0.280421 | 0.904088 | 0.412313 |
| A113 | 1.0 | 0.442612 | 0.747390 | 0.191113 |
| A114 | 1.0 | 0.066641 | 0.245840 | 0.117636 |
| A115 | 1.0 | 0.077750 | 0.234948 | 0.418861 |
| A116 | 1.0 | 0.407973 | 0.748633 | 0.005825 |
| A117 | 1.0 | 0.313471 | 0.747501 | 0.304899 |
| A118 | 1.0 | 0.186734 | 0.249543 | 0.305026 |
| A119 | 1.0 | 0.187667 | 0.748221 | 0.189055 |
| A120 | 1.0 | 0.315348 | 0.247203 | 0.113888 |
| A121 | 1.0 | 0.318552 | 0.245783 | 0.417553 |
| A122 | 1.0 | 0.446542 | 0.249804 | 0.229909 |
| A123 | 1.0 | 0.172797 | 0.747268 | 0.042402 |
| A124 | 1.0 | 0.035770 | 0.732546 | 0.385547 |
| A125 | 1.0 | 0.957292 | 0.068164 | 0.038185 |
| A126 | 1.0 | 0.933240 | 0.063268 | 0.345337 |
| A127 | 1.0 | 0.568141 | 0.574810 | 0.271449 |
| A128 | 1.0 | 0.566133 | 0.923874 | 0.271306 |
| A129 | 1.0 | 0.957710 | 0.425347 | 0.038446 |
| A130 | 1.0 | 0.931071 | 0.418673 | 0.334074 |
| A131 | 1.0 | 0.813722 | 0.573823 | 0.110850 |
| A132 | 1.0 | 0.766941 | 0.593102 | 0.408312 |
| A133 | 1.0 | 0.695761 | 0.078138 | 0.194130 |
| A134 | 1.0 | 0.697760 | 0.416083 | 0.194001 |
| A135 | 1.0 | 0.812888 | 0.920368 | 0.110587 |
| A136 | 1.0 | 0.773560 | 0.919574 | 0.427277 |
| A137 | 1.0 | 0.942406 | 0.748316 | 0.188674 |
| A138 | 1.0 | 0.570703 | 0.246989 | 0.111157 |
| A139 | 1.0 | 0.572407 | 0.253962 | 0.416290 |
| A140 | 1.0 | 0.936217 | 0.746864 | 0.041050 |
| A141 | 1.0 | 0.814077 | 0.753605 | 0.307115 |
| A142 | 1.0 | 0.689885 | 0.248784 | 0.304960 |

|      |     |          |          |          |
|------|-----|----------|----------|----------|
| A143 | 1.0 | 0.690243 | 0.747907 | 0.191394 |
| A144 | 1.0 | 0.819071 | 0.246675 | 0.103179 |
| A145 | 1.0 | 0.817726 | 0.247219 | 0.422060 |
| A146 | 1.0 | 0.942345 | 0.237535 | 0.230153 |
| A147 | 1.0 | 0.567945 | 0.747416 | 0.072896 |
| A148 | 1.0 | 0.532732 | 0.753837 | 0.384777 |
| H1   | 1.0 | 0.955066 | 0.494613 | 0.443280 |
| H2   | 1.0 | 0.168741 | 0.246710 | 0.032412 |
| H3   | 1.0 | 0.396374 | 0.710091 | 0.914529 |
| H4   | 1.0 | 0.879558 | 0.845403 | 0.500141 |
| H5   | 1.0 | 0.528618 | 0.370960 | 0.516064 |
| H6   | 1.0 | 0.477320 | 0.287824 | 0.574853 |
| H7   | 1.0 | 0.565803 | 0.165761 | 0.532787 |
| H8   | 1.0 | 0.634607 | 0.329955 | 0.565450 |
| C1   | 1.0 | 0.551490 | 0.287836 | 0.547121 |
